# Supplementary material for: Mesenteric fibromatosis in a patient with a history of neuroblastoma: a case report
Source: PubMed Central journal article supplement — J Surg Case Rep. 2018 Sep 1;2018(9):rjy209. doi: 10.1093/jscr/rjy209 (PMC6119216; doi:10.1093/jscr/rjy209), 2018-09-01
Supplement: rjy209_mesenteric_cover_letter_jscr.pdf [file rjy209_mesenteric_cover_letter_jscr.pdf]

Miseker Abate  
University of California, Department of Surgery  
101 The City Dr S, Orange, CA 92868  
[abatem@uci.edu](mailto:abatem@uci.edu)  
949-400-4837

Prof. Derek Alderson  
Editor-in-Chief  
*Journal of Surgical Case Reports*

June 20, 2018

Dear Prof Alderson

I am pleased to submit a Brief Report entitled “Mesenteric Fibromatosis in a patient with a History of Neuroblastoma – A Case Report” by Dr. Alessio Pigazzi and Miseker Abate for consideration for publication in the *Journal of Surgical Case Reports*. Previous reports have unraveled tumors associated with mesenteric fibromatosis, this manuscript builds on previous reports and presents a novel presentation of the tumor.

In this manuscript, we present a case of mesenteric fibromatosis in a patient previously diagnosed with neuroblastoma. We believe this manuscript is appropriate for publication by the *Journal of Surgical Case Reports* as unveils a new presentation of a tumor that will aid in early detection, diagnosis and management of the disease.

This manuscript has not been published and is not under consideration for publication elsewhere. We have no conflicts of interest to disclose.

Thank you for your consideration!

Sincerely,

A handwritten signature in black ink, appearing to read 'M. Abate', with a stylized flourish at the end.

Miseker Abate, MPH  
Medical Student Year 4  
University of California Irvine, Department of Surgery
